# Supplementary material
Source: publisher figshare collection journal article supplement (https://wiley.figshare.com/articles/dataset/_/3511997)
Supplement: Supplementary file 1 [file 1]

## *Ecological Archives A015-035-A1*

**Peter W. J. Baxter and Wayne M. Getz. 2005. A model-framed evaluation of elephant effects on tree and fire dynamics in African savannas. *Ecological Applications* 15:1331-1341.**

Appendix A. Model equations and parameters. \_\_\_\_\_

Nine stage classes of tree, the  $i$ -th of which (in cell  $x$  at time  $t$ ) has number of individuals  $w_{x,i}(t)$  ( $i = 1, 2, \dots, 9$ ), are modeled, based on height. We define a tenth vegetation class,  $w_{x,10}(t)$ , denoting the grass biomass (kg) in cell  $x$  at time  $t$ . These classes may be represented by the column vector

$$\mathbf{w}_x(t) = (w_{x,1}(t), \dots, w_{x,10}(t))',$$

where ' denotes the transpose of a vector.

(See Box 1 for a flow-chart depicting the model procedure.)

### *Rainfall*

To account for rainfall seasonality (Solbrig et al. 1996) and the southern Africa 20-year wet-dry cycles (Tyson and Dyer 1978, Gertenbach 1980), we model the rainfall in year  $[t, t+2]$  as a sine-wave plus noise overlaid in the long term, normalized to take the value of 1:

$$r(t) = \max \left( 0, 1 + \eta \sin \frac{\pi(t+1)}{2\omega} + z(t) \right), \quad t \text{ even (start of wet season),}$$

$$r(t) = 0, \quad t \text{ odd (start of dry season),}$$

where  $\eta$  is the amplitude (relative to the long-term mean) of wet-dry cycles of period  $\omega$  years, and  $z(t)$  is a stochastic variable accounting for interannual variation around these cycles.

### *Wet season woody plant dynamics*

The change in the woody population during a wet season starting from time  $t$  is given by:

$$w_{x,i}(t+1) = (g_{x,i-1}w_{x,i-1}(t) + (1 - g_{x,i})w_{x,i}(t))(1 - h_{x,i}(t)), \quad i = 2, 3, \dots, 9,$$

where  $w_{x,i}(t)$  is the number of individuals in cell  $x$  of woody class  $i$  at the start of the wet season,  $h_{x,i}(t)$  is loss of individuals due to encroachment by growth and expansion of larger individuals, and  $g_{x,i}(t, \mathbf{w}_x, r)$  is the transition rate from class  $i$  to class  $i+1$  for that cell and season. The seedling class ( $i = 1$ ) is given by

$$w_{x,1}(t+1) = (g_{x,0}c_x(t) + (1 - g_{x,1})w_{x,1}(t))(1 - h_{x,1}(t)),$$

where  $g_{x,0}$  is the proportion of these which successfully recruit.  $c_x(t)$  is the expected number of new seedlings emerging in cell  $x$  at time  $t$ :

$$c_x(t) = m \left[ (1 - \delta)(w_{x,8}(t-1) + w_{x,9}(t-1)) + \frac{\delta}{4} \sum_{z=\text{neighbour of } x} (w_{z,8}(t-1) + w_{z,9}(t-1)) \right],$$

where  $m$  is the fecundity of mature trees, and  $\delta$  is a dispersal parameter representing the proportion of seedlings parented by individual trees from the four neighboring cells.

The transition rate from class  $i$  to  $i+1$  is given by:

$$g_{x,i}(t) = \min(\chi_{x,i}(t), \lambda_{x,i}(t)), \quad 0 \leq i \leq 8,$$

where  $\lambda_{x,i}(t)$  is the maximum proportion of class  $i$  that can grow to class  $i+1$  without causing the cell  $x$  to overfill.  $\chi_{x,i}(t)$  represents the underlying growth rate adjusted for competition and rainfall:

$$c_{x,0}(t) = r(t)c_x(t),$$

$$c_{x,i}(t) = r(t)g_i f_{x,i}(\mathbf{w}_x(t)), \quad 1 \leq i \leq 8,$$

where  $\gamma_i$  is the underlying growth rate from class  $i$  to  $i+1$  and  $\phi_{x,i}(\mathbf{w}_x(t))$  is a "competition coefficient" (sensu [Getz and Haight 1989](#)). We approximate competitive effects by aggregating on a per-area basis:

$$\phi_{x,0}(t) = \phi_{x,1}(t) = 1 - \left( a_{x,10}(t) + \sum_{j=1}^7 a_{x,j}(t) \right),$$

$$\phi_{x,i}(t) = 1 - \sum_{j=i}^9 a_{x,j}(t), \quad i = 5, 6, 7, 8,$$

where  $a_{x,i}(t)$  represents the proportion of area (in cell  $x$  at time  $t$ ) controlled by class  $i$ , i.e.,

$$a_{x,i}(t) = \alpha_i w_{x,i}(t), \quad 1 \leq i \leq 9,$$

and  $\alpha_i$  is the "resource area" (ha; [after Kiker 1998](#)) occupied by one individual of class  $i$ . Automatic growth within sapling classes means that  $\phi_{x,i}(t) = 1$  for  $i = 2, 3, 4$ .

The expansion limiting coefficients,  $\lambda_{x,i}$  involve projecting total possible recruitment and then reducing that recruitment, in order of trees, shrubs, saplings, seedlings, in case of overflow:

$$\lambda_{x,7}(t) = \frac{1 - a_{x,8}(t) - a_{x,9}(t)}{\alpha_8 w_{x,7}(t)}.$$

This allows us to calculate  $g_{x,7}(t)$  and then proceed through the stage-classes (dropping the  $x$  and  $t$  arguments for convenience):

$$\lambda_5 = \frac{1 - \alpha_6 - \alpha_7(1 - g_7)w_7 - \alpha_8 g_7 w_7 - \alpha_8 - \alpha_9}{\alpha_6 w_5},$$

$$\lambda_1 = \frac{1 - \alpha_2 - \alpha_3 - \alpha_4 - \alpha_5(1 - g_5)w_5 - \alpha_6 g_5 w_5 - \alpha_6 - \alpha_7(1 - g_7)w_7}{\alpha_2 w_1},$$

$$\lambda_0 = \frac{1 - \alpha_1(1 - g_1)w_1 - \alpha_2 g_1 w_1 - \alpha_2 - \alpha_3 - \alpha_4 - \alpha_5(1 - g_5)w_5 - \alpha_6 g_5 w_5 - \alpha_6 - \alpha_7(1 - g_7)w_7 - \alpha_{10}}{\alpha_1 c(t)}.$$

We set  $\lambda_i = 1$  for those height classes deemed not to expand laterally upon growth to the next class, i.e.,  $i = 2, 3, 4, 6, 8$ .

We introduce  $h_i$  as a "crowding coefficient", representing the proportion of plants overcrowded by the individuals growing from class  $i$  to  $i+1$ :

$$h_6 = h_7 = \frac{(\alpha_8 - \alpha_7)g_7 w_7}{1 - \alpha_8 - \alpha_9},$$

$$h_2 = h_3 = h_4 = h_5 = \frac{(\alpha_6 - \alpha_5)g_5 w_5}{1 - \alpha_6 - \alpha_7(1 - g_7)w_7 - \alpha_8 g_7 w_7 - \alpha_8 - \alpha_9},$$

$$h_1 = \frac{(\alpha_2 - \alpha_1)g_1 w_1}{1 - \alpha_2 - \alpha_3 - \alpha_4 - \alpha_5(1 - g_5)w_5 - \alpha_6 g_5 w_5 - \alpha_6 - \alpha_7(1 - g_7)w_7}.$$

We update grass cover to account for changes in woody vegetation, elephant grazing, and rainfall:

$$\alpha_{x,10}(t+1) = r(t) \left( 1 - \sum_{i=1}^7 \alpha_{x,i}(t) \right) (1 - u_{x,10}(t)) (1 - h_{x,1}(t) - h_{x,5}(t)), \quad t \text{ even},$$

where  $u_{x,10}(t)$  is the proportion of the grass in cell  $x$  grazed by elephants. The grass biomass then increases by the productivity of the area  $\alpha_{x,10}(t+1)$ , adjusted for wet season senescence ([Illius and O'Connor 2000](#)) and for elephant grazing:

$$w_{x,10}(t+1) = s_{10}^w r(t) (1 - u_{x,10}(t)) (w_{x,10}(t) + \gamma_{10} \alpha_{x,10}(t+1)),$$

where  $\gamma_{10}$  is annual grass productivity (kg/ha), and  $s_{10}^w$  is wet-season persistence ("survival") of grass biomass.

#### *Elephant grazing*

Elephant use of cell  $x$  is in proportion to the relative amount of grass biomass present:

$$u_{x,10}(t) = l(t) I_g \frac{w_{x,10}(t) + \gamma_{10} r(t) \left( 1 - \sum_{i=1}^7 \alpha_{x,i}(t) \right)}{\sum_{x=1}^{100} \left( w_{x,10}(t) + \gamma_{10} r(t) \left( 1 - \sum_{i=1}^7 \alpha_{x,i}(t) \right) \right)},$$

where  $l(t)$  is elephant density (numbers/hectare) at time  $t$ , and  $I_g$  is the elephant intake rate of grass (kg/elephant/wet-season).

#### *Dry season woody plant dynamics*

In our model, woody plant mortality, elephant browsing and fire are limited to the dry season (see Box 1):

$$w_{x,i}(t+1) = F_i(\mathbf{w}_x(t)) s_i, r(t-1) l(t) \quad t \text{ odd},$$

where  $s_i$  is the mean survival rate of woody class  $i$ , and  $F_i$  is a concatenation of the functions,  $f_{\text{surv},i}$ ,  $f_{\text{ele},i}$  and  $f_{\text{fire},i}$ , that incorporate the effects of mortality, elephant browsing and fire respectively: i.e.,

$$f_{\text{surv},i} \equiv f_{\text{surv},i}(\mathbf{w}_{x,i}(t), r(t-1), s_i)$$

$$f_{\text{ele},i} \equiv f_{\text{ele},i}(\mathbf{w}_x(t), l(t), f_{\text{surv},i}),$$

$$F_i = f_{\text{fire},i} \equiv f_{\text{fire},i}(\mathbf{w}_x(t), f_{\text{ele},i})$$

### Woody plant survival

We assume that survival of subadult woody plants depends on the rainfall for that year, but that mature trees only experience increased mortality in droughts lasting more than two years ([Scholes 1985](#)):

$$f_{\text{surv},i}(r(t-1), s_i, \mathbf{w}_{x,i}) = s_i r(t-1) \mathbf{w}_{x,i}, \quad i = 1, \dots, 7,$$

$$f_{\text{surv},i}(r(t-1), s_i, \mathbf{w}_{x,i}) = (s_i - \mu_{8-9}^x \xi(t)) \mathbf{w}_{x,i}, \quad i = 8, 9$$

where  $\mu_{8-9}^x$  is additional mortality experienced by mature trees in drought conditions, weighted for drought severity using the function  $\xi(t)$ :

$$\xi(t) = \frac{k^\zeta}{\left( \sum_{y=1}^3 \frac{r(t-2y+1)}{3} \right)^\zeta + k^\zeta},$$

where  $\zeta$  describes the steepness of the drought response (cf. density response in [Getz 1996](#)), and  $k$  is the value of the three-year mean which causes 50% of the drought-related mortality.

### Elephant browsing

Using vector notation, the effect of elephant browsing on the woody vegetation is:

$$\mathbf{f}_{\text{ele}}(l(t), \mathbf{w}_x) = (\mathbf{I} - \mathbf{E} \cdot \mathbf{U}_x(t)) \mathbf{w}_x,$$



where  $\mu_i^e$  is the proportion of those in class  $i$  killed by elephants, and  $p_{ik}$  is the proportion of class  $i$  which are reduced in height to class  $k$  following browsing.

### Fire

The occurrence of fire in each cell is recorded by the binary variable  $b_x(t)$  and the condition for a cell burning ( $b_x(t) = 1$ ) is

$$\begin{aligned} b_x(t) &= 1 && \text{if} && R_x < \psi w_{x,10}(t), \\ b_x(t) &= 0 && \text{if} && R_x \geq \psi w_{x,10}(t), \end{aligned}$$

where  $R_x$  is a uniform random variable drawn on  $[0, 1]$  for each cell  $x$ , and  $\psi$  is a constant which scales biomass to a fire probability. This linear relationship between grass biomass and fire probability is a close approximation to the logistic regression formula produced by van [Wilgen et al. \(2000\)](#) from Kruger National Park fire history data. The spread of fire is modeled by repeating this procedure for every non-burning cell with a burning neighbor, for each burning neighbor, until no additional cells burn. We assume that fire intensity is linearly related to grass biomass ([Trollope 1984](#), [Higgins et al. 2000](#)):

$$\beta_x(t) = \frac{b_x(t) w_{x,10}(t)}{w_{\max}},$$

where  $\beta_x(t)$  is the fire intensity relative to that yielded by a grass biomass of  $w_{\max}$ .

The woody vegetation is adjusted for fire effects as follows:

$$f_{\text{fire},i}(w_{x,i}(t)) = (1 - \tau_{x,i}(t)) w_{x,i}(t) + \kappa_{i+1} \tau_{x,i+1}(t) w_{x,i+1}(t),$$

where  $\kappa_i$  is the proportion of top-killed plants in stage-class  $i$  that resprout following fire. The proportion of woody plants in class  $i$  experiencing topkill is given by  $\tau_{x,i}(t)$ :

$$\tau_{x,1}(t) = b_x(t),$$

$$\tau_{x,i}(t) = \min \left( 1, \frac{b_x(t) w_{x,10}(t)}{w^*} \right), \quad 2 \leq i \leq 5,$$

$$\tau_{x,i}(t) = \mu_{6-7}^{\beta} \beta_x(t), \quad i = 6, 7,$$

$$\tau_{x,i}(t) = \mu_{8-9}^{\beta} \beta_x(t), \quad i = 8, 9,$$

where  $w^*$  is the grass fuel required to kill 100% of saplings, and  $\mu_{6-7}^{\beta}$  and  $\mu_{8-9}^{\beta}$  are the topkill rates of shrubs and mature trees, respectively, under maximum intensity fires.

### Dry season grass dynamics

We assume that grass burns entirely in fires, and otherwise senesces (depending on rainfall):

$$\alpha_{x,10}(t+1) = (1 - b_x(t)) \alpha_{x,10}(t), \quad t \text{ odd},$$

$$w_{x,10}(t+1) = r(t-1) s_{10}^D (1 - b_x(t)) w_{x,10}(t),$$

where  $s_{10}^D$  is the dry-season persistence ("survival") of grass biomass.

### LITERATURE CITED

- Baxter, P. W. J. 2003. Modeling the impact of the African elephant, *Loxodonta africana*, on woody vegetation in semi-arid savannas. Dissertation. University of California, Berkeley, California, USA.
- Croze, H. 1974. The Seronera bull problem. II. The trees. East African Wildlife Journal **12**:29–47.
- Gertenbach, W. P. D. 1980. Rainfall patterns in the Kruger National Park. Koedoe **23**:35–43.
- Getz, W. M. 1996. A hypothesis regarding the abruptness of density dependence and the growth rate of populations. Ecology **77**:2014–2026.
- Getz, W. M., and R. G. Haight. 1989. Population harvesting: demographic models of fish, forest, and animal resources. Princeton University Press, Princeton, New Jersey, USA.
- Higgins, S. I., W. J. Bond, and W. S. W. Trollope. 2000. Fire, resprouting and variability: a recipe for grass-tree coexistence in savanna. Journal of Ecology **88**:213–229.

Illius, A. W., and T. G. O'Connor. 2000. Resource heterogeneity and ungulate population dynamics. *Oikos* **89**:283–294.

Kiker, G. A. 1998. Development and comparison of savanna ecosystem models to explore the concept of carrying capacity. Dissertation. Cornell University, Ithaca, New York, USA.

Lewis, D. M. 1987. Fruiting patterns, seed germination, and distribution of *Sclerocarya caffra* in an elephant-inhabited woodland. *Biotropica* **19**:50–56.

Scholes, R. J. 1985. Drought related grass, tree and herbivore mortality in a southern African savanna. Pages 350–353 in J. C. Tothill and J. J. Mott, editors. *Ecology and management of the world's savannas*. Commonwealth Agricultural Bureaux, Canberra, Australia.

Solbrig, O. T., E. Medina, and J. F. Silva. 1996. Determinants of tropical savannas. Pages 31–41 in O. T. Solbrig, E. Medina, and J. F. Silva, editors. *Biodiversity and Savanna Ecosystem Processes*. Springer-Verlag, Berlin, Germany.

Trollope, W. S. W. 1984. Fire behaviour. Pages 199–218 in P. de V. Booysen and N. M. Tainton, editors. *Ecological effects of fire in South African ecosystems*. Springer-Verlag, Berlin, Germany.

Tyson, P. D., and T. G. J. Dyer. 1978. The predicted above-normal rainfall of the seventies and the likelihood of droughts in the eighties in South Africa. *South African Journal of Science* **74**:372–377.

van Wilgen, B. W., H. C. Biggs, S. P. O'Regan, and N. Marè. 2000. A fire history of the savanna ecosystems in the Kruger National Park, South Africa, between 1941 and 1996. *South African Journal of Science* **96**:167–178.

TABLE A1. Parameters and variables used (in alphabetical order). For parameters, roman type indicates default values and italics indicate initial conditions. Asterisks in the "Values" column are used to indicate functions, calculated in the course of each simulation. Parameters values were derived from an extensive review of the African savanna literature ([Baxter 2003](#)).

| Symbol              | Description                                                                                                                             | Units             | Values                                                           |
|---------------------|-----------------------------------------------------------------------------------------------------------------------------------------|-------------------|------------------------------------------------------------------|
| $a_{x,i}(t)$        | area controlled by woody vegetation classes in cell $x$ at time $t$<br><br>$i = 1,$<br>$2 \leq i \leq 5,$<br>$i = 6, 7,$<br>$i = 8, 9.$ | ha                | <i>0.0012</i><br><i>0.1996</i><br><i>0.2075</i><br><i>0.0918</i> |
| $a_{x,10}(t)$       | grass coverage in cell $x$ at time $t$                                                                                                  | ha                | <i>0.5000</i>                                                    |
| $b_x$               | fire indicator for cell $x$                                                                                                             | binary            | 0                                                                |
| $c_x$               | potential seedlings emerging in cell $x$                                                                                                | plants            | 0                                                                |
| <b>E</b>            | elephant browsing effect matrix                                                                                                         | —                 | *                                                                |
| $F()$               | dry-season woody plant function comprised of $f_{\text{ele}}, f_{\text{fire}}, f_{\text{mort}}$ .                                       | —                 | *                                                                |
| $f_{\text{ele}}()$  | dry-season elephant impact function for woody plants                                                                                    | —                 | *                                                                |
| $f_{\text{fire}}()$ | dry-season fire-impact function for woody plants                                                                                        | —                 | *                                                                |
| $f_{\text{surv}}()$ | dry-season survival function for woody plants                                                                                           | —                 | *                                                                |
| $g_{x,i}$           | realized transition rate from class $i$ to $i+1$ for cell $x$                                                                           | —                 | *                                                                |
| $h_{x,i}$           | crowding coefficient resulting from growth to class $i+1$ in cell $x$                                                                   | —                 | *                                                                |
| $i$                 | vegetation class index: woody classes ( $1 \leq i \leq 9$ ), grass biomass ( $i = 10$ )                                                 | —                 | *                                                                |
| $I_g$               | intake rate of grass by elephants, wet season only                                                                                      | kg/ele/season     | 4600                                                             |
| $I_{1-7}$           | elephant use of sub-adult woody plants, dry season only                                                                                 | plants/ele/season | 5667                                                             |
| $I_{8-9}$           | elephant use of adult trees, dry season only                                                                                            | plants/ele/season | 1000                                                             |
| $k$                 | value of mean relative rainfall resulting in 50% of the maximum drought-related tree mortality ( $\mu_m^r$ )                            | —                 | 0.8                                                              |
| $l(t)$              | elephant density at time $t$                                                                                                            | individuals/ha    | <i>0.0</i>                                                       |
| $m$                 | fecundity of mature trees                                                                                                               | seedlings/tree/yr | 50                                                               |
| $n$                 | number of hectare cells in grid                                                                                                         | —                 | 100                                                              |
| $R_x$               | uniform random variable drawn from U(0, 1)                                                                                              | —                 | *                                                                |
| $r(t)$              | rainfall relative to the long-term mean (=0 for dry seasons)                                                                            | —                 | <i>1.0</i>                                                       |

|                |                                                                                      |                                                                                                          |             |                                                                            |
|----------------|--------------------------------------------------------------------------------------|----------------------------------------------------------------------------------------------------------|-------------|----------------------------------------------------------------------------|
| $s_i$          | survival of woody class $i$                                                          | $i = 1,$<br>$2 \leq i \leq 5,$<br>$i = 6, 7,$<br>$i = 8, 9.$                                             | —           | 0.950<br>0.990<br>0.994<br>0.995                                           |
| $s_{10}^D$     | dry season survival (non-senescence) of grass                                        |                                                                                                          | —           | 0.2                                                                        |
| $s_{10}^W$     | wet season survival (non-senescence) of grass                                        |                                                                                                          | —           | 0.8                                                                        |
| $t$            | time index                                                                           |                                                                                                          | half-year   | *                                                                          |
| $\mathbf{U}_x$ | diagonal matrix with $\mathbf{u}_x$ on the diagonal                                  |                                                                                                          | —           | *                                                                          |
| $\mathbf{u}_x$ | elephant woody plant use vector for cell $x$                                         |                                                                                                          | —           | *                                                                          |
| $u_{x,i}$      | elephant browsing intensity on woody class $i$ in cell $x$ (dry seasons)             |                                                                                                          | —           | *                                                                          |
| $u_{x,10}$     | elephant grazing intensity in cell $x$ (wet seasons)                                 |                                                                                                          | —           | *                                                                          |
| $v_i$          | elephant preference weighting for woody class $i$                                    | $i = 1,$<br>$2 \leq i \leq 9.$                                                                           | —           | 0<br>1                                                                     |
| $w_{x,i}(t)$   | number of woody plants of class $i$ ( $1 \leq i \leq 9$ ), in cell $x$ , at time $t$ | $i = 1,$<br>$i = 2,$<br>$i = 3,$<br>$i = 4,$<br>$i = 5,$<br>$i = 6,$<br>$i = 7,$<br>$i = 8,$<br>$i = 9.$ | individuals | 1211.4<br>767.8<br>507.2<br>335.0<br>386.4<br>168.1<br>62.4<br>28.4<br>8.3 |
| $w_{x,10}(t)$  | biomass of grass in cell $x$ at time $t$                                             |                                                                                                          | kg          | 1200                                                                       |
| $w_{\max}$     | grass biomass yielding maximum intensity fire                                        |                                                                                                          | kg          | 5000                                                                       |

|                   |                                                                                                                                                         |             |                                                                                       |
|-------------------|---------------------------------------------------------------------------------------------------------------------------------------------------------|-------------|---------------------------------------------------------------------------------------|
| $w^*$             | grass fuel required for a fire to kill 100% saplings                                                                                                    | kg          | 2500                                                                                  |
| $\mathbf{w}_x(t)$ | vector of woody structure in cell $x$ at time $t$                                                                                                       | individuals | *                                                                                     |
| $x$               | cell index ( $1 \leq x \leq 100$ )                                                                                                                      | —           | *                                                                                     |
| $z(t)$            | rainfall random variable drawn from $N(0, \sigma_r^2)$                                                                                                  | —           | *                                                                                     |
| $\alpha_i$        | area controlled by one individual of class $i$<br><br>$i = 1,$<br>$2 \leq i \leq 5,$<br>$i = 6, 7,$<br>$i = 8, 9.$                                      | ha          | $1 \times 10^{-6}$<br>$1 \times 10^{-4}$<br>$9 \times 10^{-4}$<br>$25 \times 10^{-4}$ |
| $\beta_x$         | relative fire intensity in cell $x$                                                                                                                     | —           | *                                                                                     |
| $\gamma_i$        | expected transition rate (under mean, uncrowded conditions) from $i$ to $i+1$<br><br>$1 \leq i \leq 4,$<br>$i = 5,$<br>$i = 6,$<br>$i = 7,$<br>$i = 8.$ | —           | 1.000<br>0.353<br>0.300<br>0.300<br>0.150                                             |
| $\gamma_{10}$     | net annual grass productivity under mean rainfall                                                                                                       | kg/ha       | 2500                                                                                  |
| $\delta$          | proportion of seedlings dispersing to neighboring cells                                                                                                 | —           | 0.05                                                                                  |
| $\zeta$           | drought severity steepness control (shape parameter)                                                                                                    | —           | 50                                                                                    |
| $\eta$            | amplitude of wet-dry rainfall cycles, relative to long-term mean                                                                                        | —           | 0.13                                                                                  |
| $\kappa_i$        | resprouting rate of woody class $i$ following fire<br><br>$i = 1,$<br>$2 \leq i \leq 7,$<br>$8 \leq i \leq 9.$                                          | —           | 0.0<br>0.9<br>0.0                                                                     |
| $\lambda_{x,i}$   | expansion-limiting coefficient for woody class $i$ in cell $x$                                                                                          | —           | *                                                                                     |
| $\mu_{6-7}^b$     | shrub topkill under maximum intensity fire                                                                                                              | —           | 0.80                                                                                  |
| $\mu_{8-9}^b$     | mature tree mortality under maximum intensity fire                                                                                                      | —           | 0.02                                                                                  |
| $\mu_i^e$         | mortality of class $i$ plants browsed by elephants<br><br>$i = 1,$                                                                                      | —           | 1.00<br>0.25<br>0.25                                                                  |

|               |                                                                        |                                                                                                           |                          |
|---------------|------------------------------------------------------------------------|-----------------------------------------------------------------------------------------------------------|--------------------------|
|               |                                                                        | $2 \leq i \leq 5,$<br>$i = 6, 7,$<br>$i = 8, 9.$                                                          | 0.80                     |
| $\mu_{8-9}^r$ | additional drought mortality for mature trees                          | —                                                                                                         | 0.05                     |
| $\xi$         | drought severity coefficient                                           | —                                                                                                         | *                        |
| $\pi_x$       | proportion of elephant foraging allocated to cell $x$                  | —                                                                                                         | *                        |
| $\pi'_{x,i}$  | proportion of elephant foraging allocated to class $i$ in cell $x$     | —                                                                                                         | *                        |
| $\rho_{ik}$   | proportion of class $i$ reduced to class $k$ after elephant use        | $2 \leq i \leq 5$ ( $k = 1$ ),<br>$i = 6, 7$ ( $k = 5$ ),<br>$i = 8$ ( $k = 5$ ),<br>$i = 8$ ( $k = 7$ ). | 0.5<br>0.5<br>0.1<br>0.1 |
| $\sigma_r$    | standard deviation in annual rainfall relative to long-term mean       | mm                                                                                                        | 0.30                     |
| $\tau_i$      | topkill rate of woody class $i$ due to fire                            | —                                                                                                         | *                        |
| $\phi_{x,i}$  | competition coefficient applied to growth rate of woody class $i$      | —                                                                                                         | *                        |
| $\chi_{x,i}$  | net growth rate of woody class $i$ given sufficient area for expansion | —                                                                                                         | *                        |
| $\psi$        | scaling constant converting grass biomass to fire probability          | $\text{kg}^{-1}$                                                                                          | $10^{-4}$                |
| $\omega$      | period of wet-dry rainfall cycles                                      | years                                                                                                     | 20                       |

[\[Back to A015-035\]](#)
