# Supplementary material
Source: publisher figshare collection journal article supplement (https://wiley.figshare.com/articles/dataset/_/3511997)
Supplement: Supplementary file 2 [file 1]

Archive with 2 entries (2 files):
- appendix-A.htm
- appendix-A.pdf
