# Supplementary material
Source: publisher figshare collection journal article supplement (https://wiley.figshare.com/articles/dataset/_/3511997)
Supplement: Supplementary file 2 [file 1 › appendix-A.htm]

Ecological Archives A015-035-A1


### *Ecological Archives* A015-025-A1

### **Peter W. J. Baxter and Wayne M. Getz. 2005. A model-framed evaluation of elephant effects on tree and fire dynamics in African savannas. *Ecological Applications* 15:1331–1341.**

Appendix A. Model equations and parameters. A pdf file is also available.

Nine stage classes of tree,
the *i*-th of which (in cell *x* at time *t*) has number
of individuals *wx,i*(*t*) (*i* = 1,
2, …, 9), are modeled, based on height.  We define a tenth vegetation
class, *wx,*10(*t*), denoting the grass
biomass (kg) in cell *x* at time *t*. These classes may be represented
by the column vector

|  |
| --- |
| **w***x*(*t*) = (*wx,*1(*t*),…, *wx,*10(*t*))', |

where ' denotes the transpose
of a vector. 

(See Box
1 for a flow-chart depicting the model procedure.)

*Rainfall*

To account for rainfall seasonality
(Solbrig et al. 1996) and the southern Africa 20-year wet-dry cycles (Tyson and Dyer 1978,
Gertenbach 1980), we model the rainfall in year [*t*,
*t+*2] as a sine-wave plus noise overlaid in the long term, normalized
to take the value of 1:

|  |
| --- |
|  |
|  |
|  |

where 
is the amplitude (relative to the long-term mean) of wet-dry cycles of period
 years, and *z*(*t*)
is a stochastic variable accounting for interannual variation around these
cycles. 

*Wet season
woody plant dynamics*

The change in the woody population
during a wet season starting from time *t* is given by:

|  |
| --- |
| , |

where *wx,i*(*t*)
is the number of individuals in cell *x* of woody class *i* at
the start of the wet season, *hx,i*(*t*) is loss of
individuals due to encroachment by growth and expansion of larger individuals,
and *gx,i* (= *gx,i*(*t*, **w***x*,
*r*)) is the transition rate from class *i* to class *i*+1
for that cell and season.  The seedling class (*i* = 1) is given
by

|  |
| --- |
| , |

where *gx,*0
is the proportion of these which successfully recruit.  *cx*(*t*)
is the expected number of new seedlings emerging in cell *x* at time
*t*:

|  |
| --- |
| , |

where *m* is the fecundity
of mature trees, and 
is a dispersal parameter representing the proportion of seedlings parented
by individual trees from the four neighboring cells. 

The transition rate from class
*i* to *i*+1 is given by:

|  |  |
| --- | --- |
| *gx,i*(*t*) = min (*x,i*(*t*), *x,i*(*t*)), | 0 *i*  8, |

where *x,i*(t)
is the maximum proportion of class *i* that can grow to class *i*+1
without causing the cell *x* to overfill.  *x,i*(*t*)
represents the underlying growth rate adjusted for competition and rainfall:

|  |  |
| --- | --- |
| *cx,*0(*t*) = *r*(*t*)*cx*(*t*), |  |
|  |  |
| *cx,i*(*t*) = *r*(*t*)*gi fx,i*(**w***x*(*t*)), | 1 *i*  8, |

where *i*
is the underlying growth rate from class *i* to *i+*1 and *x,i*(**w***x*(*t*))
is a "competition coefficient" (sensuGetz and Haight
1989).  We approximate competitive effects by aggregating on a
per-area basis:

|  |
| --- |
| , |
|  |
|  |

where *ax,i*(*t*)
represents the proportion of area (in cell *x* at time *t*) controlled
by class *i*, i.e.,

|  |  |
| --- | --- |
| *ax,i*(*t*) = *iwx,i*(*t*), | 1 *i*  9, |

and *i*
is the "resource area" (ha; after Kiker 1998) occupied
by one individual of class *i*.  Automatic growth within sapling
classes means that *x,i*(*t*)*=*1for *i* = 2, 3, 4. 

The expansion limiting coefficients,
*x,i*
involve projecting total possible recruitment and then reducing that recruitment,
in order of trees, shrubs, saplings, seedlings, in case of overflow:

|  |
| --- |
|  |

This allows us to calculate
*gx,*7(*t*) and then proceed through the
stage-classes (dropping the *x* and *t* arguments for convenience):

|  |
| --- |
|  |
|  |
|  |
|  |
|  |

We set *i*
= 1 for those height classes deemed not to expand laterally upon growth
to the next class, i.e., *i* = 2, 3, 4, 6, 8.

We introduce *hi*as a "crowding coefficient", representing the proportion of plants overcrowded
by the individuals growing from class *i* to *i*+1:

|  |
| --- |
|  |
|  |
|  |

*Wet season
grass dynamics*

We update grass cover to account
for changes in woody vegetation, elephant grazing, and rainfall:

|  |
| --- |
|  |

where *ux*,10(*t*)
is the proportion of the grass in cell *x* grazed by elephants. 
The grass biomass then increases by the productivity of the area *ax*,10(*t*+1),
adjusted for wet season senescence (Illius and O'Connor 2000)
and for elephant grazing:

|  |
| --- |
| , |

where 10
is annual grass productivity (kg/ha), and  is wet-season persistence
("survival") of grass biomass.

##### 

*Elephant grazing*

Elephant use of cell *x*
is in proportion to the relative amount of grass biomass present:

|  |
| --- |
| , |

where *l*(*t*) is
elephant density (numbers/hectare) at time *t*, and *Ig*
is the elephant intake rate of grass (kg/elephant/wet-season). 

*Dry season
woody plant dynamics*

In our model, woody plant mortality,
elephant browsing and fire are limited to the dry season (see Box 1):

|  |
| --- |
|  |

where *si* is
the mean survival rate of woody class *i*, and *Fi*
is a concatenation of the functions, *f*surv,*i*, *f*ele,*i*
and *f*fire,*i*, that incorporate the effects of mortality,
elephant browsing and fire respectively: i.e.,

|  |
| --- |
|  |
|  |
|  |
|  |
| . |

*Woody plant
survival*

We assume that survival of subadult
woody plants depends on the rainfall for that year, but that mature trees
only experience increased mortality in droughts lasting more than two years
(Scholes 1985):

|  |
| --- |
| , |
|  |
|  |

where  is additional mortality
experienced by mature trees in drought conditions, weighted for drought
severity using the function (*t*): 

|  |
| --- |
| , |

where 
describes the steepness of the drought response (cf. density response in
Getz 1996), and *k* is the value of the three-year
mean which causes 50% of the drought-related mortality.

*Elephant browsing*

Using vector notation, the effect
of elephant browsing on the woody vegetation is:

|  |
| --- |
| , |

where **f**ele
is the column vector (*f*ele,1, *f*ele,2,
…, *f*ele,9)′, **E** is an elephant-effect
matrix mapping the rates of death and stunting resulting from elephant browsing,
**I** is the (9´9) identity matrix and **U***x*(*t*)
is a 9´9 diagonal matrix with the elements of **u***x*(*t*),
an elephant-use vector for cell *x*, on the diagonal.  The vector
**u***x*(*t*) is composed of the elements *ux,i*(*t*),
representing the proportion of each stage-class used.  We assume that
elephants allocate their foraging effort between cells in proportion to
the cells "perceived attractiveness", and within cells in proportion
to each stage class's (preference-weighted) availability (Croze
1974; see also Lewis 1987):

|  |
| --- |
| , |
|  |
| , |

where *n* is the number
of cells in the grid (*n* = 100), *vi* is the "preference-value"
for stage-class *i* (*v*1 = 0 as we assume seedlings
are not browsed), *I*1-7 is the elephant intake rate of
sub-adult woody plants, (plants per elephant per dry season), and *I*8-9
is the elephant intake rate of adult trees (plants per elephant per dry
season).  If *wx,i*(*t*) = 0 then we also set
*ux,i*(*t*) = 0. 

The elephant-effect matrix **E**
adjusts the woody vegetation for the impact of elephant browsing, incorporating
both mortality and sub-lethal effects:

where  is
the proportion of those in class *i* killed by elephants, and *ik*
is the proportion of class *i* which are reduced in height to class
*k* following browsing. 

*Fire*

The occurrence of fire in each
cell is recorded by the binary variable *bx*(*t*) and
the condition for a cell burning (*bx*(*t*) = 1) is

|  |  |  |
| --- | --- | --- |
| *bx*(*t*) = 1 | if | *Rx* <*wx*,10(*t*), |
|  |  |  |
| *bx*(*t*) = 0 | if | *Rx* ³ *wx*,10(*t*), |

where *Rx* is
a uniform random variable drawn on [0, 1] for each cell *x*, and 
is a constant which scales biomass to a fire probability.  This linear
relationship between grass biomass and fire probability is a close approximation
to the logistic regression formula produced by van Wilgen
et al. (2000) from Kruger
National Park fire history data.  The spread
of fire is modeled by repeating this procedure for every non-burning cell
with a burning neighbor, for each burning neighbor, until no additional
cells burn.  We assume that fire intensity is linearly related to grass
biomass (Trollope 1984, Higgins et al.
2000):

|  |
| --- |
| , |

where *x*(*t*)
is the fire intensity relative to that yielded by a grass biomass of *w*max.

The woody vegetation is adjusted
for fire effects as follows:

|  |
| --- |
| , |

where *i*
is the proportion of top-killed plants in stage-class *i* that resprout
following fire.  The proportion of woody plants in class *i* experiencing
topkill is given by*x,i*(*t*):

|  |
| --- |
|  |
|  |
|  |
|  |
|  |
|  |
|  |

where *w\** is the grass
fuel required to kill 100% of saplings, and  and  are the topkill rates
of shrubs and mature trees, respectively, under maximum intensity fires. 

*Dry season
grass dynamics*

We assume that grass burns entirely
in fires, and otherwise senesces (depending on rainfall):

|  |
| --- |
|  |
|  |
| , |

where  is the dry-season
persistence ("survival") of grass biomass.

LITERATURE
CITED

Baxter, P. W. J.  2003. 
Modeling the impact of the African elephant, *Loxodonta africana*,
on woody vegetation in semi-arid savannas.  Dissertation.  University
of California, Berkeley, California, USA.

Croze, H.  1974. 
The Seronera bull problem.  II. The trees.  East African Wildlife
Journal **12**:29–47.

Gertenbach, W. P. D.  1980. 
Rainfall patterns in the Kruger National Park. 
Koedoe **23**:35–43.

Getz, W. M.  1996. 
A hypothesis regarding the abruptness of density dependence and the growth
rate of populations.  Ecology **77**:2014–2026.

Getz, W. M., and R. G. Haight. 
1989.  Population harvesting: demographic models of fish, forest, and
animal resources.  Princeton University
Press, Princeton, New Jersey, USA.

Higgins, S. I., W. J. Bond,
and W. S. W. Trollope.  2000.  Fire, resprouting and variability:
a recipe for grass-tree coexistence in savanna.  Journal of Ecology
**88**:213–229.

Illius, A. W., and T. G. O'Connor. 
2000.  Resource heterogeneity and ungulate population dynamics. 
Oikos **89**:283–294.

Kiker, G. A.  1998. 
Development and comparison of savanna ecosystem models to explore the concept
of carrying capacity.  Dissertation. Cornell University, Ithaca,
New York, USA.

Lewis, D. M.  1987. 
Fruiting patterns, seed germination, and distribution of *Sclerocarya
caffra* in an elephant-inhabited woodland.  Biotropica **19**:50–56.

Scholes, R. J.  1985. 
Drought related grass, tree and herbivore mortality in a southern African
savanna.  Pages 350–353 *in* J. C. Tothill and J. J. Mott,
editors.  Ecology and management of the world's savannas.  Commonwealth
Agricultural Bureaux, Canberra,
Australia.

Solbrig, O. T., E.
Medina, and J. F. Silva.  1996.  Determinants of tropical savannas. 
Pages 31–41 *in* O. T. Solbrig, E. Medina,
and J. F. Silva, editors. Biodiversity and Savanna Ecosystem Processes. 
Springer-Verlag, Berlin,
Germany.

Trollope, W. S. W.  1984. 
Fire behaviour.  Pages 199–218 *in* P. de V. Booysen and
N. M. Tainton, editors.  Ecological effects of fire in South African
ecosystems.  Springer-Verlag, Berlin, Germany.

Tyson, P. D., and T. G. J. Dyer. 
1978.  The predicted above-normal rainfall of the seventies and the
likelihood of droughts in the eighties in South Africa.  South
African Journal of Science **74**:372–377.

van Wilgen, B. W., H. C. Biggs,
S. P. O’Regan, and N. Marè.  2000.  A fire history
of the savanna ecosystems in the Kruger National Park, South Africa, between
1941 and 1996.  South African Journal of Science **96**:167–178.

TABLE
A1. Parameters and variables used (in alphabetical order). For parameters,
roman type indicates default values and italics indicate initial conditions. 
Asterisks in the "Values" column are used to indicate functions, calculated
in the course of each simulation.  Parameters values were derived from
an extensive review of the African savanna literature (Baxter
2003).

|  |  |  |  |
| --- | --- | --- | --- |
| Symbol | Description | Units | Values |
| *ax,i(t)* | area controlled by woody vegetation classes in cell *x* at time *t*  *i* = 1,   2 *i*  5,  *i* = 6, 7,  *i* = 8, 9. | ha | *0.0012  0.1996  0.2075  0.0918* |
| *ax,*10(*t*) | grass coverage in cell *x* at time *t* | ha | *0.5000* |
| *bx* | fire indicator for cell *x* | binary | 0 |
| *cx* | potential seedlings emerging in cell *x* | plants | 0 |
| **E** | elephant browsing effect matrix | – | \* |
| *F()* | dry-season woody plant function comprised of *f*ele, *f*fire, *f*mort. | – | \* |
| *f*ele() | dry-season elephant impact function for woody plants | – | \* |
| *f*fire() | dry-season fire-impact function for woody plants | – | \* |
| *f*surv() | dry-season survival function for woody plants | – | \* |
| *gx,i* | realized transition rate from class *i* to *i*+1 for cell *x* | – | \* |
| *hx,i* | crowding coefficient resulting from growth to class *i*+1 in cell *x* | – | \* |
| *i* | vegetation class index: woody classes (1  *i*  9), grass biomass (*i* = 10) | – | \* |
| *Ig* | intake rate of grass by elephants, wet season only | kg/ele/season | 4600 |
| *I*1-7 | elephant use of sub-adult woody plants, dry season only | plants/ele/season | 5667 |
| *I*8-9 | elephant use of adult trees, dry season only | plants/ele/season | 1000 |
| *k* | value of mean relative rainfall resulting in 50% of the maximum drought-related tree mortality (*mr*) | – | 0.8 |
| *l*(*t*) | elephant density at time *t* | individuals/ha | *0.0* |
| *m* | fecundity of mature trees | seedlings/tree/yr | 50 |
| *n* | number of hectare cells in grid | – | 100 |
| *Rx* | uniform random variable drawn from U(0, 1) | – | \* |
| *r(t)* | rainfall relative to the long-term mean (=0 for dry seasons) | – | *1.0* |
| *si* | survival of woody class *i*  *i* = 1,   2  *i*  5,  *i* = 6, 7,  *i* = 8, 9. | – | 0.950  0.990  0.994  0.995 |
| *s*10*D* | dry season survival (non-senescence) of grass | – | 0.2 |
| *s*10*W* | wet season survival (non-senescence) of grass | – | 0.8 |
| *t* | time index | half-year | \* |
| **U***x* | diagonal matrix with **u***x* on the diagonal | – | \* |
| **u***x* | elephant woody plant use vector for cell *x* | – | \* |
| *ux,i* | elephant browsing intensity on woody class *i* in cell *x* (dry seasons) | – | \* |
| *ux*,10 | elephant grazing intensity in cell *x* (wet seasons) | – | \* |
| *vi* | elephant preference weighting for woody class *i*  *i* = 1,  2  *i*  9. | – | 0  1 |
| *wx,i*(*t*) | number of woody plants of class *i* (1  *i*  9), in cell *x*, at time *t*  *i* = 1,   *i* = 2,   *i* = 3,   *i* = 4,   *i* = 5,   *i* = 6,   *i* = 7,   *i* = 8,   *i* = 9. | individuals | *1211.4*  *767.8*  *507.2*  *335.0*  *386.4*  *168.1*  *62.4*  *28.4*  *8.3* |
| *wx*,10(*t*) | biomass of grass in cell *x* at time *t* | kg | *1200* |
| *w*max | grass biomass yielding maximum intensity fire | kg | 5000 |
| *w\** | grass fuel required for a fire to kill 100% saplings | kg | 2500 |
| **w***x*(*t*) | vector of woody structure in cell *x* at time *t* | individuals | \* |
| *x* | cell index (1  *x*  100) | – | \* |
| *z*(*t*) | rainfall random variable drawn from N(0, *r*2) | – | \* |
| *i* | area controlled by one individual of class *i*  *i* = 1,   2  *i*  5,  *i* = 6, 7,  *i* = 8, 9. | ha | 1 × 10–6  1 × 10–4  9 × 10–4  25 × 10–4 |
| *x* | relative fire intensity in cell *x* | – | \* |
| *i* | expected transition rate (under mean, uncrowded conditions) from *i* to *i*+1  1  *i*  4,  *i* = 5,  *i* = 6,  *i* = 7,  *i* = 8. | – | 1.000  0.353  0.300  0.300  0.150 |
| 10 | net annual grass productivity under mean rainfall | kg/ha | 2500 |
|  | proportion of seedlings dispersing to neighboring cells | – | 0.05 |
|  | drought severity steepness control (shape parameter) | – | 50 |
|  | amplitude of wet-dry rainfall cycles, relative to long-term mean | – | 0.13 |
| *i* | resprouting rate of woody class *i* following fire  *i* = 1,  2  *i*  7,  8  *i*  9. | – | 0.0  0.9  0.0 |
| *x,i* | expansion-limiting coefficient for woody class *i* in cell *x* | – | \* |
| 6-7*b* | shrub topkill under maximum intensity fire | – | 0.80 |
| 8-9*b* | mature tree mortality under maximum intensity fire | – | 0.02 |
| *ie* | mortality of class *i* plants browsed by elephants  *i* = 1,  2  *i*  5,   *i* = 6, 7,  *i* = 8, 9. | – | 1.00  0.25  0.25  0.80 |
| 8-9*r* | additional drought mortality for mature trees | – | 0.05 |
|  | drought severity coefficient | – | \* |
| *x* | proportion of elephant foraging allocated to cell *x* | – | \* |
| *'x,i* | proportion of elephant foraging allocated to class *i* in cell *x* | – | \* |
| *ik* | proportion of class *i* reduced to class *k* after elephant use  2  *i*  5 (*k* = 1),  *i* = 6, 7 (*k* = 5),  *i* = 8 (*k* = 5),  *i* = 8 (*k* = 7). | – | 0.5  0.5  0.1  0.1 |
| *r* | standard deviation in annual rainfall relative to long-term mean | mm | 0.30 |
| *i* | topkill rate of woody class *i* due to fire | – | \* |
| *x,i* | competition coefficient applied to growth rate of woody class *i* | – | \* |
| *x,i* | net growth rate of woody class *i* given sufficient area for expansion | – | \* |
|  | scaling constant converting grass biomass to fire probability | kg–1 | 10–4 |
|  | period of wet-dry rainfall cycles | years | 20 |

---

  
[Back to A015-035]
